# Supplementary material for: The Role of Artistic Creative Activities in Navigating the COVID-19 Pandemic in Australia
Source: PubMed Central journal article supplement (PMC8423921; doi:10.3389/fpsyg.2021.696202), 2021-08-25

# The Role of Artistic Creative Activities in Navigating the COVID-19 Pandemic in Australia

doi: 10.3389/fpsyg.2021.696202

**Frederic Kiernan<sup>a,\*</sup>, Anthony Chmiel<sup>a,b</sup>, Sandra Garrido<sup>b</sup>, Martha Hickey<sup>c,d</sup> & Jane W. Davidson<sup>a</sup>**

<sup>a</sup>Melbourne Conservatorium of Music, University of Melbourne, Melbourne, VIC, Australia

<sup>b</sup>The MARCS Institute for Brain, Behaviour, and Development, Western Sydney University, Sydney, NSW, Australia

<sup>c</sup>Department of Obstetrics and Gynaecology, University of Melbourne, Melbourne, VIC, Australia

<sup>d</sup>Royal Women's Hospital, Melbourne, VIC, Australia

**\* Correspondence:**

Frederic Kiernan

kiernanf@unimelb.edu.au

## *Supplementary Material*

The following material was collated in this supplementary document to avoid an overly length main document.

This document contains six Supplementary Tables, and two Supplementary Figures. Supplementary Tables and Figures are presented in the order in which they appear in the main document.

**Supplementary Table 1.**

*ACAs undertaken during the pandemic, reported for the entire sample (N = 653). The percentage refers to the number of participants from the sample who reported undertaking this ACA.*

| <b>Rank</b>            | <b>Artistic creative activity (ACA)</b>                   | <b>Frequency (%) of ACA reported</b> |
|------------------------|-----------------------------------------------------------|--------------------------------------|
| 1                      | Watching films or TV shows                                | 523 (80.1%)                          |
| 2                      | Listening to music                                        | 472 (72.3%)                          |
| 3                      | Cookery or baking                                         | 416 (63.7%)                          |
| 4                      | Reading novels, stories, poetry, or plays                 | 398 (60.9%)                          |
| 5                      | Gardening/attending indoor plants                         | 332 (50.8%)                          |
| 6                      | Painting or drawing                                       | 321 (49.2%)                          |
| 7                      | Creative writing                                          | 239 (36.6%)                          |
| 8                      | Viewing/contemplating artworks (books, online...)         | 239 (36.6%)                          |
| 9                      | Textile crafts                                            | 229 (35.1%)                          |
| 10                     | Photography                                               | 203 (31.1%)                          |
| 11                     | Singing                                                   | 186 (28.5%)                          |
| 12                     | Playing video games                                       | 171 (26.2%)                          |
| 13                     | Playing a musical instrument                              | 150 (23%)                            |
| 14                     | Dancing                                                   | 141 (21.6%)                          |
| 15                     | Other                                                     | 104 (15.9%)                          |
| 16                     | Making films or videos                                    | 100 (15.3%)                          |
| 17                     | Creating art/animations on computer                       | 90 (13.8%)                           |
| 18                     | Composing music/songs                                     | 62 (9.5%)                            |
| 19                     | Sculpture                                                 | 53 (8.1%)                            |
| 20                     | Fashion/costume design                                    | 49 (7.5%)                            |
| 21                     | Make-up artistry                                          | 44 (6.7%)                            |
| 22                     | Jewellery making                                          | 44 (6.7%)                            |
| 23                     | Pottery/ceramics                                          | 40 (6.1%)                            |
| 24                     | Wood crafts (carving, furniture...)                       | 32 (4.9%)                            |
| 25                     | Rehearsing/performing play, drama, opera, musical theatre | 28 (4.3%)                            |
| 26                     | Learning/practising magic tricks/circus skills            | 23 (3.5%)                            |
| 27                     | Calligraphy                                               | 22 (3.4%)                            |
| <b>Total responses</b> |                                                           | <b>4710</b>                          |

**Supplementary Table 2.**

*ACAs stopped during the pandemic, reported for the entire sample (N = 653). The percentage is in reference to the total number of reported stopped ACAs.*

| <b>Rank</b> | <b>Artistic creative activity (ACA)</b>                   | <b>Frequency (%)<br/>reporting ACA stopped</b> |
|-------------|-----------------------------------------------------------|------------------------------------------------|
| 1           | Dancing                                                   | 62 (11.8%)                                     |
| 2           | Rehearsing/performing play, drama, opera, musical theatre | 57 (10.8%)                                     |
| 3           | Singing                                                   | 47 (8.9%)                                      |
| 4           | Photography                                               | 39 (7.4%)                                      |
| 5           | Watching films or TV shows                                | 36 (6.8%)                                      |
| 6           | Painting or drawing                                       | 33 (6.3%)                                      |
| 7           | Cookery or baking                                         | 32 (6.1%)                                      |
| 8           | Playing a musical instrument                              | 32 (6.1%)                                      |
| 9           | Listening to music                                        | 27 (5.1%)                                      |
| 10          | Gardening/attending indoor plants                         | 25 (4.7%)                                      |
| 11          | Making films or videos                                    | 18 (3.4%)                                      |
| 12          | Make-up artistry                                          | 17 (3.2%)                                      |
| 13          | Fashion/costume design                                    | 16 (3%)                                        |
| 14          | Other                                                     | 16 (3%)                                        |
| 15          | Pottery/ceramics                                          | 15 (2.8%)                                      |
| 16          | Composing music/songs                                     | 10 (1.9%)                                      |
| 17          | Creating art/animations on computer                       | 8 (1.5%)                                       |
| 18          | Playing video games                                       | 8 (1.5%)                                       |
| 19          | Wood crafts (carving, furniture...)                       | 8 (1.5%)                                       |

|                        |                                                   |            |
|------------------------|---------------------------------------------------|------------|
| 20                     | Sculpture                                         | 7 (1.3%)   |
| 21                     | Jewellery making                                  | 6 (1.1%)   |
| 22                     | Learning/practising magic tricks/circus skills    | 6 (1.1%)   |
| 23                     | Calligraphy                                       | 1 (0.2%)   |
| 24                     | Creative writing                                  | 0 (0%)     |
| 25                     | Reading novels, stories, poetry, or plays         | 0 (0%)     |
| 26                     | Textile crafts                                    | 0 (0%)     |
| 27                     | Viewing/contemplating artworks (books, online...) | 0 (0%)     |
| <b>Total responses</b> |                                                   | <b>526</b> |

**Supplementary Table 3.**

*Categorized ACAs from the open-ended descriptions accompanying responses of “Other” regarding ACAs undertaken during the pandemic.*

| <b>ACAs undertaken during the pandemic (categorization of open-ended “Other” responses)</b>                                  | <b>Count</b> |
|------------------------------------------------------------------------------------------------------------------------------|--------------|
| Other art creation (e.g., resin casting; candle-making; installation art; prop-making...)                                    | 19           |
| Puzzles or board/tabletop games                                                                                              | 17           |
| Paper crafting                                                                                                               | 10           |
| Creating or helping new programs/community opportunities for creative activities                                             | 10           |
| Interior decoration                                                                                                          | 9            |
| Listening to podcasts                                                                                                        | 8            |
| Art with glass, rocks, beads, or mosaics                                                                                     | 8            |
| Printmaking                                                                                                                  | 5            |
| Learning something new related to a creative activity (e.g., repairing musical instruments; researching fine art techniques) | 4            |
| General activities or playing with children or pets                                                                          | 3            |
| <i>Lego</i> building                                                                                                         | 3            |
| Learning a new language                                                                                                      | 2            |
| Building models                                                                                                              | 2            |
| Making toys for a child (not necessarily wood-crafting)                                                                      | 1            |
| Creating fun activities from numeracy, literacy, art and science school curricula                                            | 1            |
| Creating a podcast                                                                                                           | 1            |
| Making natural healthcare products with essential oils                                                                       | 1            |
| <b>Total “Other” responses (ACAs undertaken)</b>                                                                             | <b>104</b>   |

**Supplementary Table 4.**

*Categorized ACAs from the open-ended descriptions accompanying responses of “Other” regarding ACAs stopped during the pandemic.*

| <b>Activities stopped since the onset of the pandemic (categorization of open-ended “Other” responses)</b> | <b>Count</b> |
|------------------------------------------------------------------------------------------------------------|--------------|
| Puzzles or board/tabletop games                                                                            | 4            |
| Creating or helping new programs/community opportunities for creative activities                           | 4            |
| Art with glass, rocks, beads, or mosaics                                                                   | 2            |
| Paper crafting                                                                                             | 2            |
| Learning a new language                                                                                    | 1            |
| Modelling (model shoots)                                                                                   | 1            |
| Listening to podcasts and audiobooks                                                                       | 1            |
| Going to a book club                                                                                       | 1            |
| <b>Total “Other” responses (ACAs stopped)</b>                                                              | <b>16</b>    |

**Supplementary Table 5.**

*ACAs ranked as the most effective at making participants “feel better” during the pandemic, for the entire sample. Participants gave rankings for each of the ACAs they undertook, from 1 (being the most effective), and increasing in rank as effectiveness decreased. The Overall Rank is based on the Mean of the reported rank of effectiveness for each ACA.*

| <b>Overall Rank</b> | <b>Artistic creative activity (ACA)</b>                   | <b>Min. rank</b> | <b>Max. rank</b> | <b>M of rank</b> | <b>SD</b> | <b>Variance</b> |
|---------------------|-----------------------------------------------------------|------------------|------------------|------------------|-----------|-----------------|
| 1                   | Listening to music                                        | 1                | 13               | 3.48             | 2.24      | 5.02            |
| 2                   | Other                                                     | 1                | 13               | 3.85             | 2.73      | 7.46            |
| 3                   | Singing                                                   | 1                | 15               | 3.88             | 2.77      | 7.67            |
| 4                   | Dancing                                                   | 1                | 14               | 4.07             | 2.84      | 8.08            |
| 5                   | Gardening/attending indoor plants                         | 1                | 14               | 4.16             | 2.75      | 7.54            |
| 6                   | Painting or drawing                                       | 1                | 14               | 4.25             | 2.85      | 8.13            |
| 7                   | Playing a musical instrument                              | 1                | 14               | 4.44             | 3.03      | 9.20            |
| 8                   | Textile crafts                                            | 1                | 15               | 4.45             | 3.10      | 9.61            |
| 9                   | Creative writing                                          | 1                | 15               | 4.85             | 3.01      | 9.09            |
| 10                  | Cookery or baking                                         | 1                | 15               | 4.88             | 2.98      | 8.89            |
| 11                  | Composing music/songs                                     | 1                | 16               | 5.07             | 3.21      | 10.33           |
| 12                  | Reading novels, stories, poetry, or play                  | 1                | 18               | 5.17             | 2.94      | 8.64            |
| 13                  | Pottery or ceramics                                       | 1                | 14               | 5.30             | 3.61      | 13.06           |
| 14                  | Fashion or costume design                                 | 1                | 16               | 5.30             | 3.20      | 10.21           |
| 15                  | Wood crafts (carving, furniture...)                       | 1                | 14               | 5.50             | 3.04      | 9.25            |
| 16                  | Sculpture                                                 | 1                | 12               | 5.60             | 3.28      | 10.79           |
| 17                  | Rehearsing/performing play, drama, opera, musical theatre | 1                | 17               | 5.62             | 4.23      | 17.85           |
| 18                  | Watching films or TV shows                                | 1                | 16               | 5.65             | 2.95      | 8.72            |
| 19                  | Playing video games                                       | 1                | 17               | 6.07             | 3.56      | 12.65           |

## Supplementary Material

|    |                                                   |   |    |      |      |       |
|----|---------------------------------------------------|---|----|------|------|-------|
| 20 | Learning/practising magic tricks/circus skills    | 1 | 14 | 6.27 | 4.45 | 19.83 |
| 21 | Making films or videos                            | 1 | 16 | 6.29 | 3.29 | 10.83 |
| 22 | Calligraphy                                       | 1 | 12 | 6.30 | 3.33 | 11.08 |
| 23 | Creating art/animations on computer               | 1 | 14 | 6.32 | 3.33 | 11.11 |
| 24 | Photography                                       | 1 | 16 | 6.41 | 3.46 | 11.97 |
| 25 | Jewellery making                                  | 1 | 13 | 7.13 | 3.2  | 10.25 |
| 26 | Viewing/contemplating artworks (books, online...) | 2 | 16 | 7.21 | 2.78 | 7.7   |
| 27 | Make-up artistry                                  | 2 | 16 | 7.69 | 3.74 | 13.98 |



**Supplementary Table 6.**

Significance and effect size (Cohen's *d*) for Šidák-corrected post hoc tests between the MusEQ subscales and also between the ERS-ACA subscales.

| <b>MusEQ subscales compared</b>   |   |                               | <b><i>p</i></b> | <b><i>d</i></b> |
|-----------------------------------|---|-------------------------------|-----------------|-----------------|
| Daily                             | – | Emotion <sup>†</sup>          | <.001           | 0.43            |
| Daily <sup>†</sup>                | – | Perform                       | <.001           | 0.75            |
| Daily                             | – | Consume                       | .089            | 0.10            |
| Daily                             | – | Respond <sup>†</sup>          | .004            | 0.16            |
| Daily                             | – | Prefer <sup>†</sup>           | <.001           | 0.35            |
| Emotion <sup>†</sup>              | – | Perform                       | <.001           | 1.20            |
| Emotion <sup>†</sup>              | – | Consume                       | <.001           | 0.54            |
| Emotion <sup>†</sup>              | – | Respond                       | <.001           | 0.23            |
| Emotion                           | – | Prefer                        | >.999           | 0.03            |
| Perform                           | – | Consume <sup>†</sup>          | <.001           | 0.67            |
| Perform                           | – | Respond <sup>†</sup>          | <.001           | 0.87            |
| Perform                           | – | Prefer <sup>†</sup>           | <.001           | 1.08            |
| Consume                           | – | Respond <sup>†</sup>          | <.001           | 0.26            |
| Consume                           | – | Prefer <sup>†</sup>           | <.001           | 0.45            |
| Respond                           | – | Prefer <sup>†</sup>           | .028            | 0.17            |
| <b>ERS-ACA subscales compared</b> |   |                               | <b><i>p</i></b> | <b><i>d</i></b> |
| General factor                    | – | Avoidance <sup>†</sup>        | <.001           | 0.30            |
| General factor <sup>†</sup>       | – | Approach                      | <.001           | 0.37            |
| General factor                    | – | Self-development              | .122            | 0.06            |
| Avoidance <sup>†</sup>            | – | Approach                      | <.001           | 0.61            |
| Avoidance <sup>†</sup>            | – | Self-development              | <.001           | 0.21            |
| Approach                          | – | Self-development <sup>†</sup> | <.001           | 0.38            |

Note. † is included for significant comparisons, to denote which subscale was rated higher.

**Supplementary Figure 1.**

Mean ratings for the six MusEQ subscales. The 35 items were rated from 1 (“Not at all”) to 5 (“Very much”). Error bars =  $\pm 1$  SE.

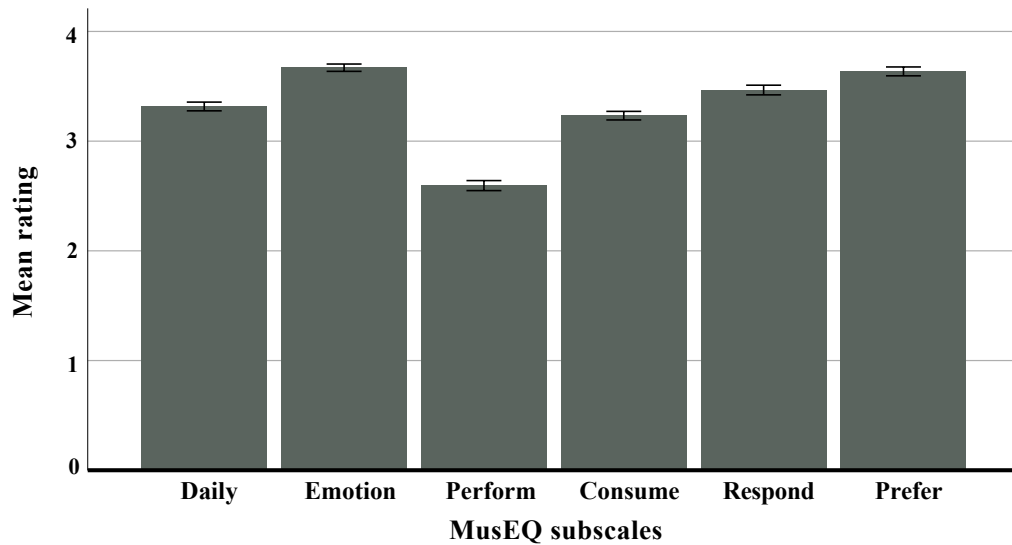**Supplementary Figure 2.**

Mean ratings for the four ERS-ACA subscales. The 18 items were rated from 1 (“Strongly disagree”) to 5 (“Strongly agree”). The “General factor” subscale is the overall mean value of all 18 items, whereas the Avoidance, Approach, and Self-development subscales are each the mean value of 7 items, 6 items, and 5 items respectively. Error bars =  $\pm 1$  SE.

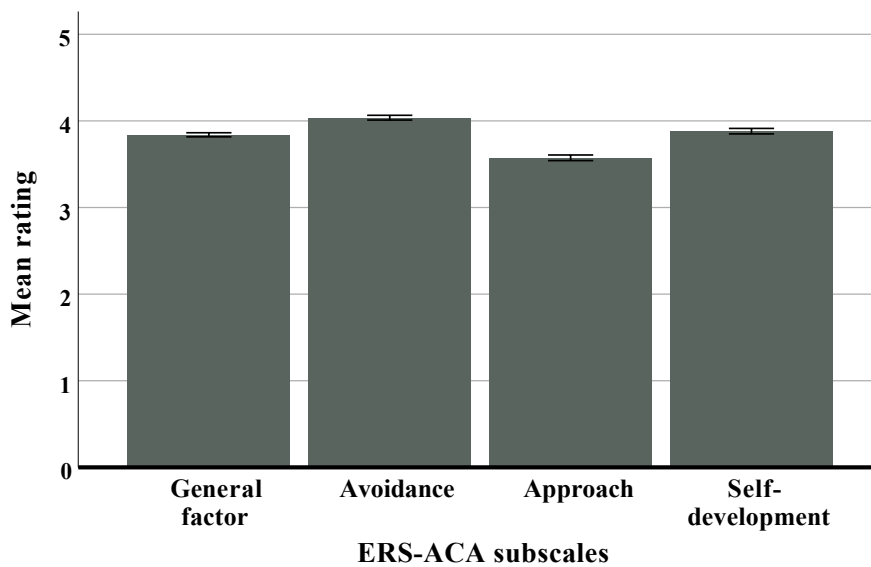

Supplement: Data_Sheet_1.pdf [file Data_Sheet_1.pdf]
